# Supplementary material
Source: publisher figshare collection journal article supplement (https://acs.figshare.com/ndownloader/files/11184530)

# Supporting Information

## Low temperature solution-processable cesium lead bromide microcrystals for light conversion

*Quyet Van Le<sup>†</sup>, Jong Won Lee<sup>††</sup>, Woonbae Sohn<sup>†††</sup>, Ho Won Jang<sup>†††\*</sup>, Jong Kyu Kim<sup>††\*</sup>, and Soo Young Kim<sup>†\*</sup>*

<sup>†</sup>School of Chemical Engineering and Materials Science, Integrative research center for two-dimensional functional materials, Chung-Ang University, 84 Heukseok-ro, Dongjak-gu, Seoul, 06974, Republic of Korea

<sup>††</sup>Department of Materials Science and Engineering, Pohang University of Science and Technology (POSTECH), Pohang, Gyeongbuk, 790-784, Republic of Korea

<sup>†††</sup>Department of Materials Science and Engineering, Research Institute of Advanced Materials, Seoul National University, Seoul 08826, Republic of Korea

**Figure S1.** Optical images of  $\text{PbBr}_2\text{:CsBr/DMSO}$  before adding  $\text{HBr}$ . The precursors were prepared by mixing  $\text{PbBr}_2$  and  $\text{CsBr}$  in DMSO solvent with different concentrations of 5, 10, 20, 30, and 40 wt%, which is denoted as 1, 2, 3, 4, and 5. The volume of DMSO is fixed as 1 mL.

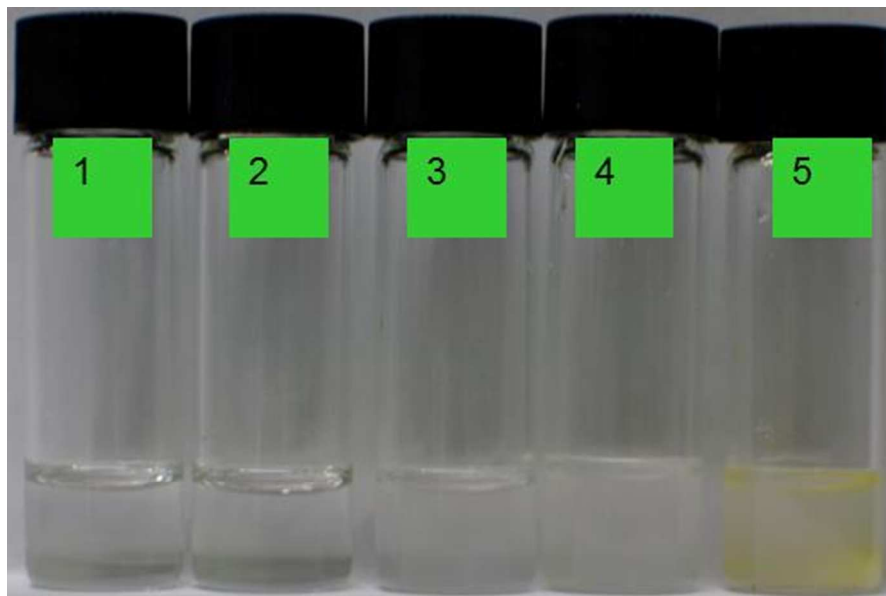

**Figure S2.** Photographs showing the formation of  $\text{CsPbBr}_3$  MCs in HBr and its transformation to  $\text{Cs}_4\text{PbBr}_6$  MCs on adding DMSO.

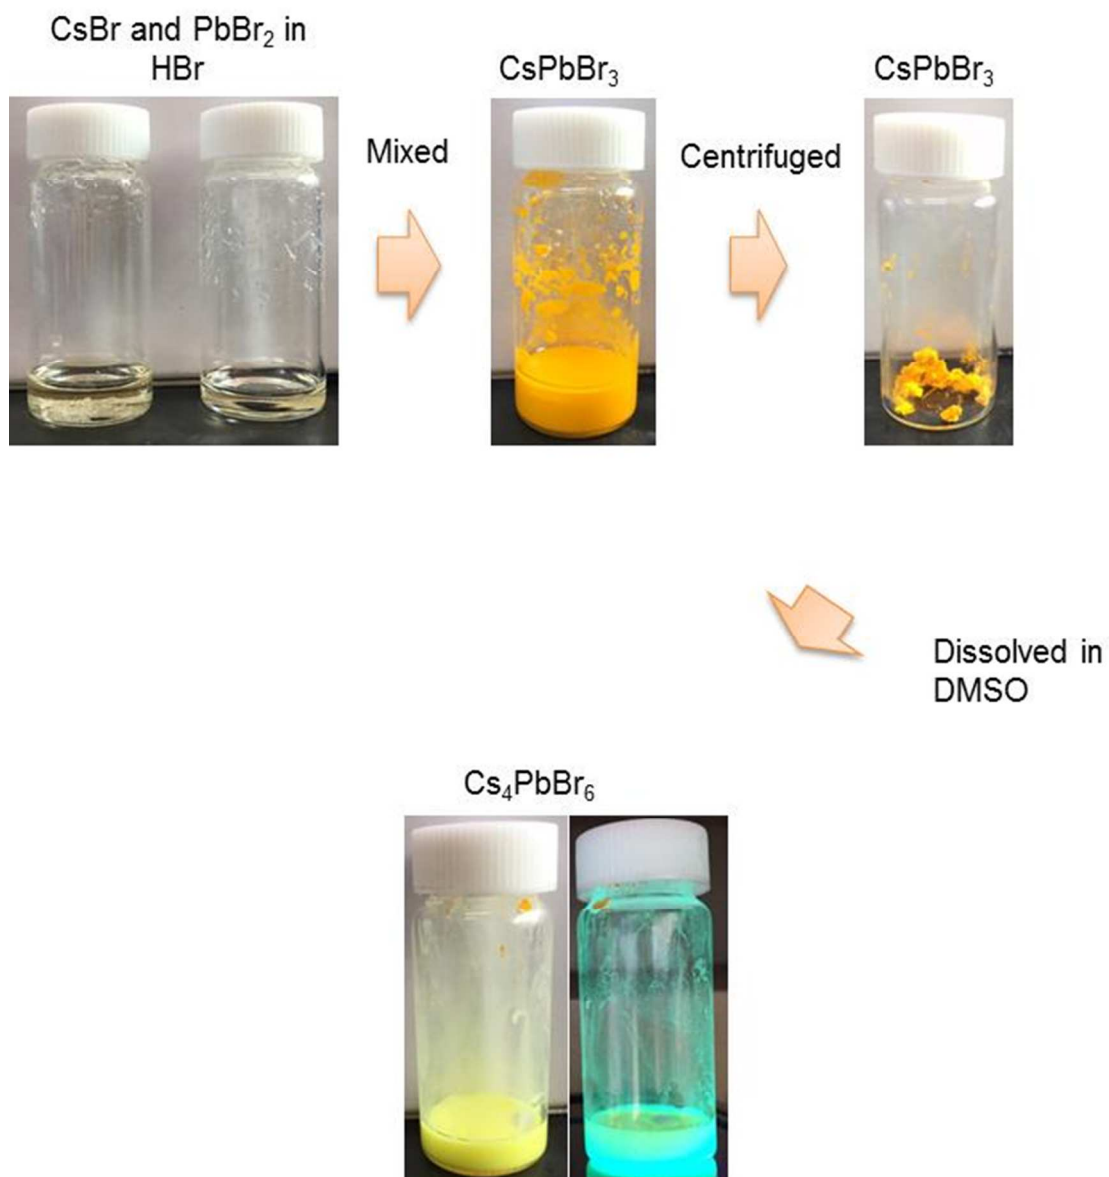

**Figure S3.** (a) SEM image and (b) XRD pattern of CsPbBr<sub>3</sub> MCs formed using only HBr as the solvent.

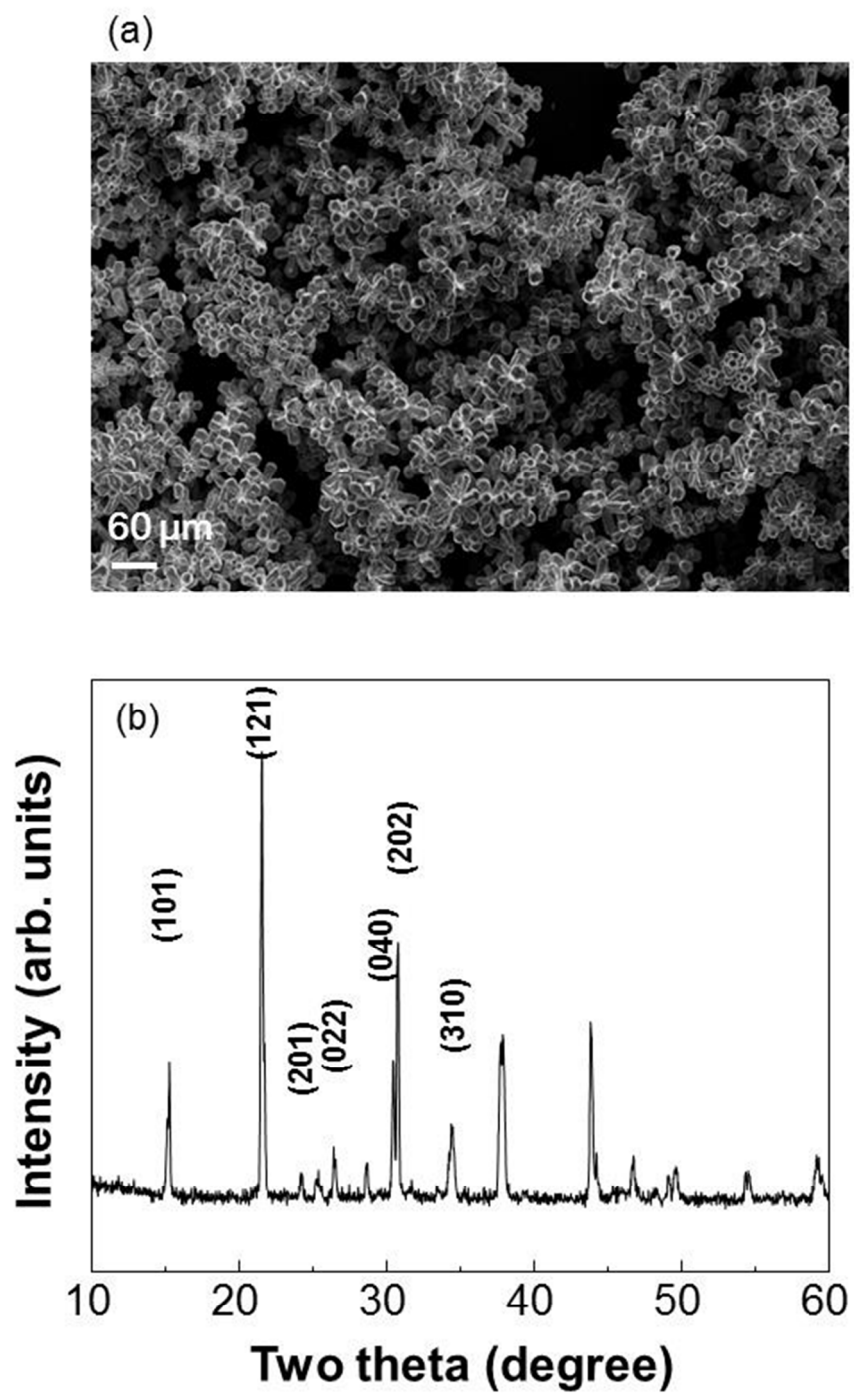

**Figure S4.** (a) SEM image and (b) XRD pattern of  $\text{Cs}_4\text{PbBr}_6$  MCs produced from  $\text{CsPbBr}_3$  MCs in DMSO

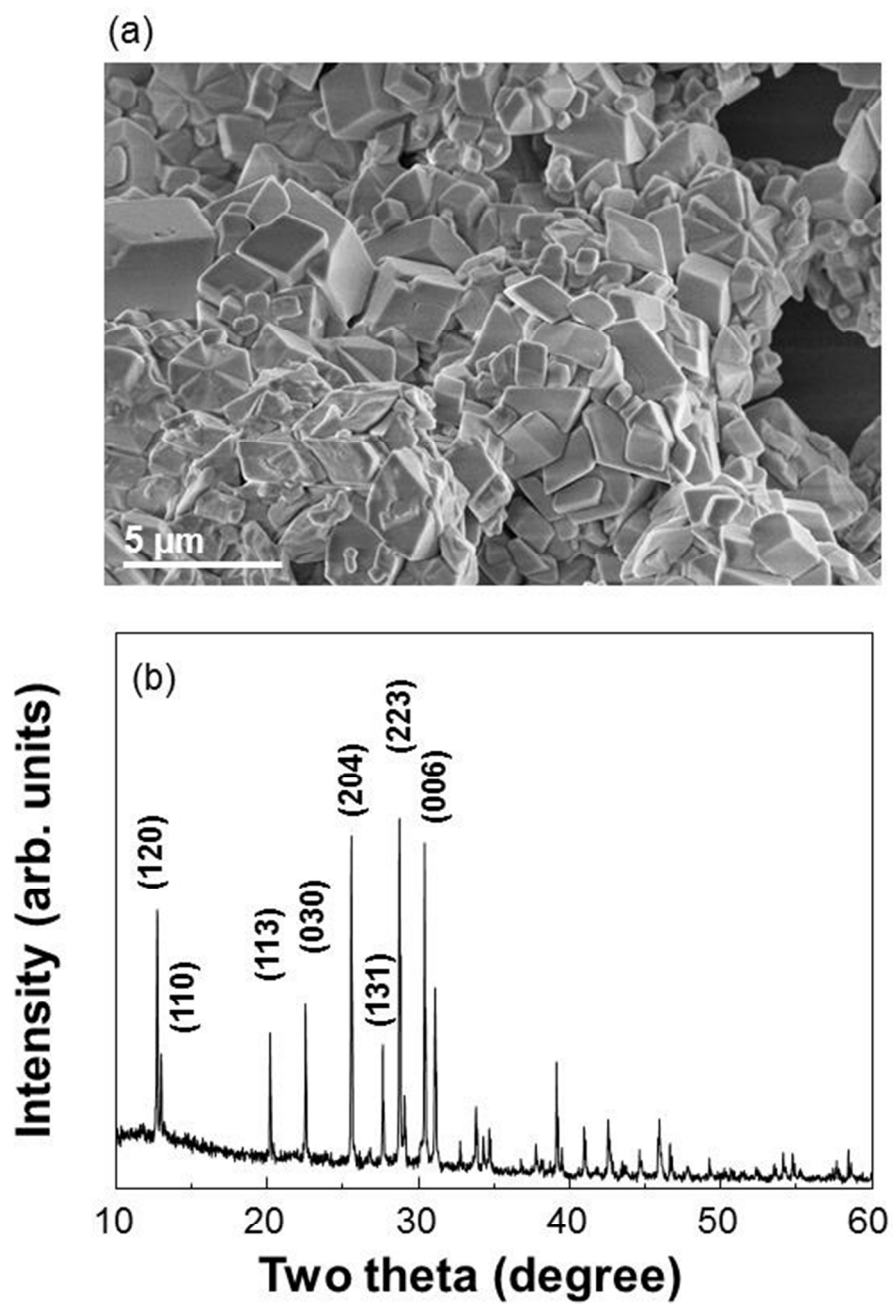

**Figure S5.** (a) SEM image and (b) XRD pattern of CsPbBr<sub>3</sub> QDs.

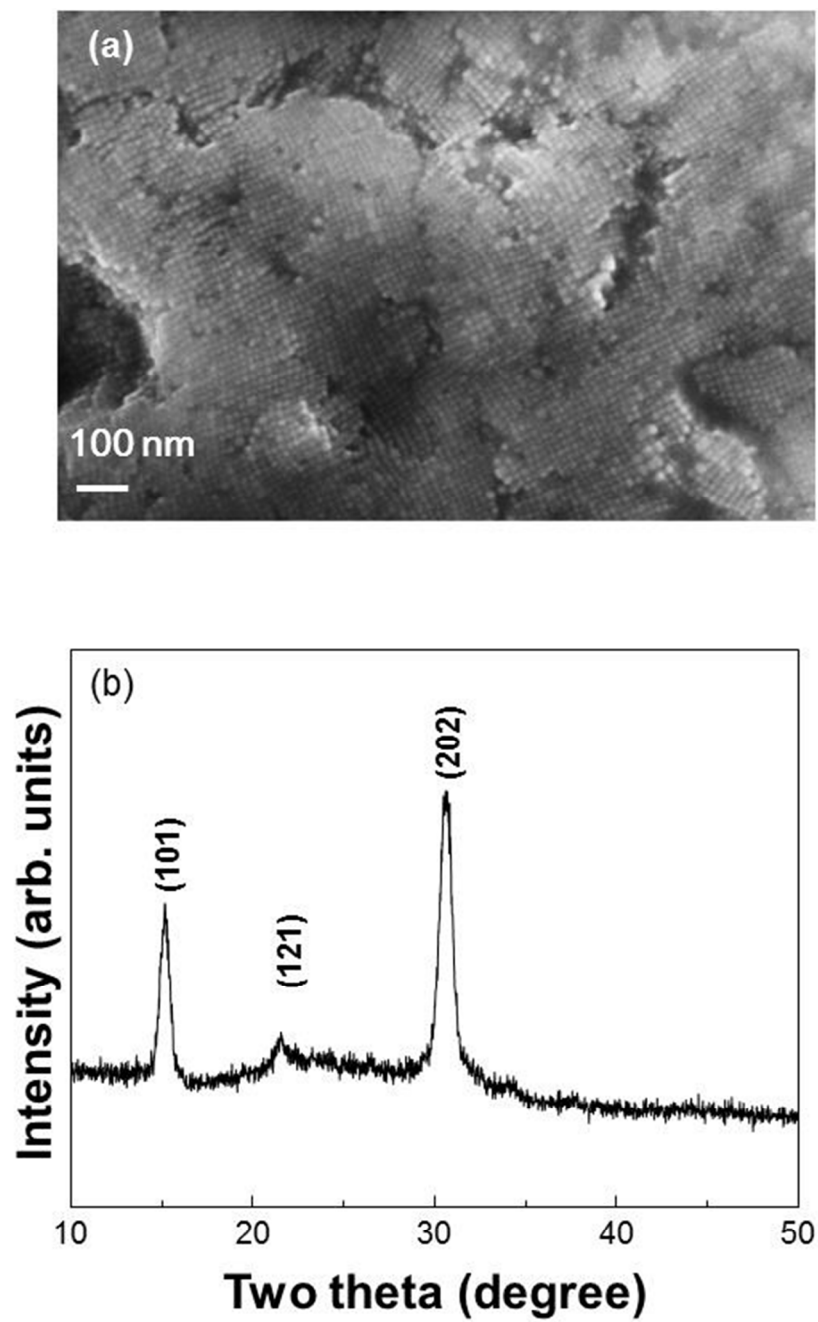

**Figure S6.** Schematic crystal structures of  $\text{CsPbBr}_3$  and  $\text{Cs}_4\text{PbBr}_6$ .

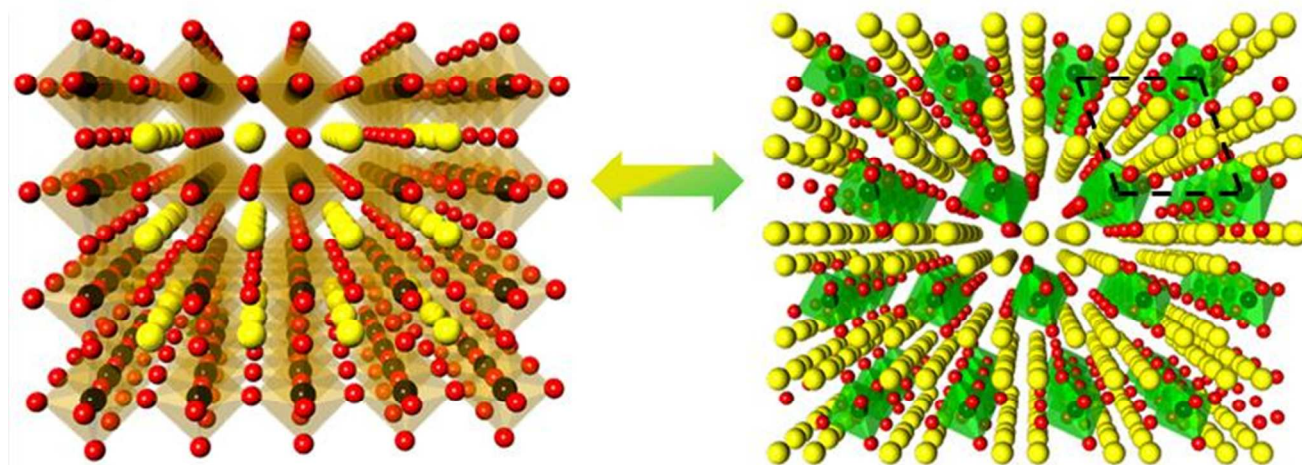

**Figure S7.** TGA spectra of CsPbBr<sub>3</sub> MCs, Cs<sub>4</sub>PbBr<sub>6</sub> MCs, CsBr, and PbBr<sub>2</sub> measured from 30 to 1000 °C.

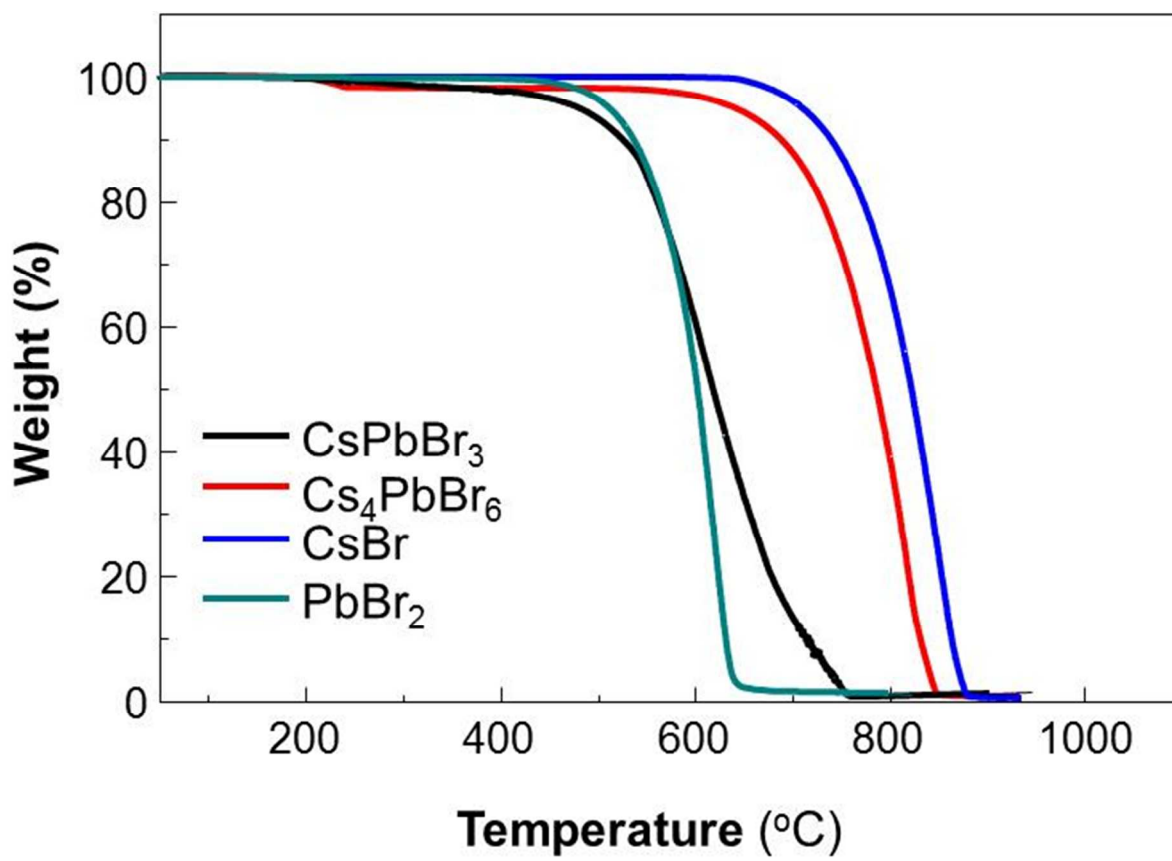



**Figure S8.** CsPbBr<sub>3</sub> QDs/PMMA, CsPbBr<sub>3</sub> MCs/PMMA, and Cs<sub>4</sub>PbBr<sub>6</sub> MCs/PMMA films with different thickness on sapphire (a) under visible light and (b) under UV light. The dropping volume is fixed as 25, 50, 100, and 200  $\mu$ L.

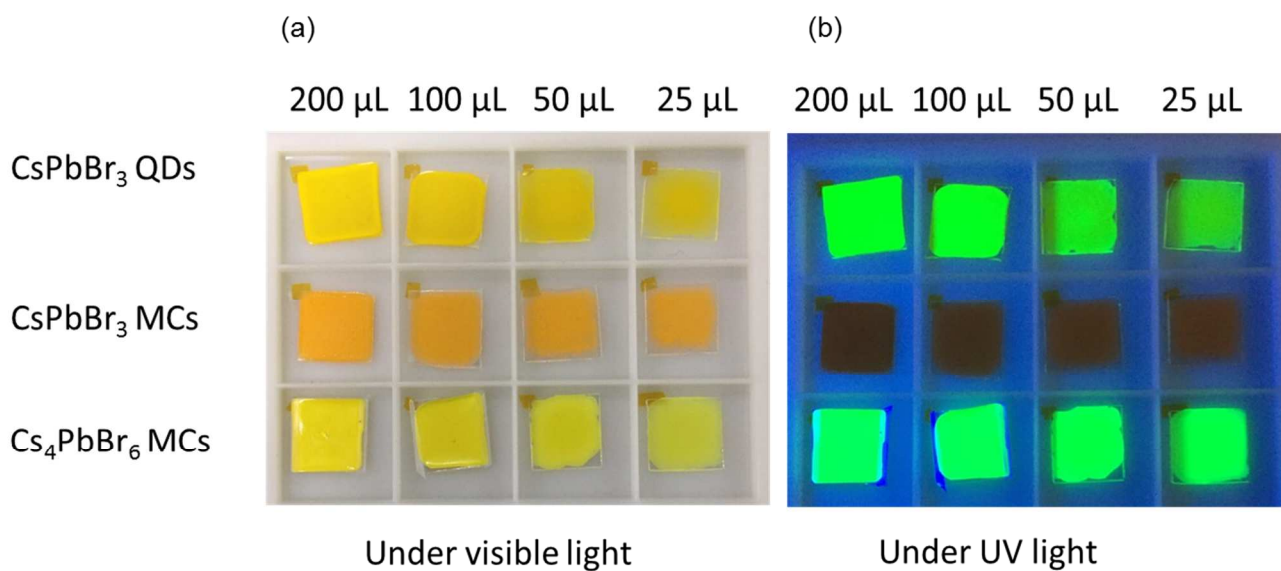

**Figure S9.** (a) The current-voltage curve and (b) electroluminescence spectrum of the UV-LED.  
(b) The maximum electroluminescence achieved at the wavelength of 265.5 nm.

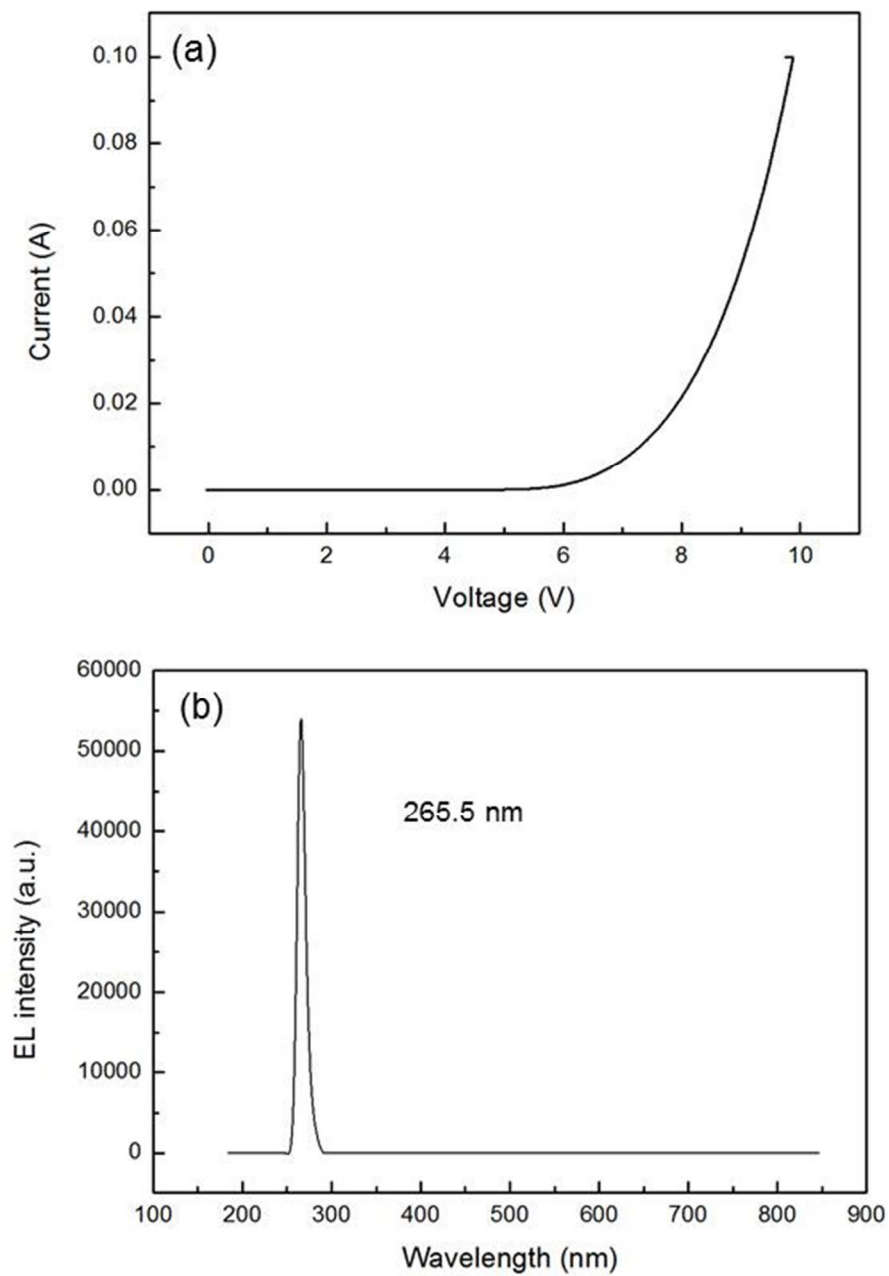

**Figure S10.** The commercial UV-LED (UVC LED 6868) on the chuck of the probe station (a) without a film and (b) with the Cs<sub>4</sub>PbBr<sub>6</sub> MCs/PMMA film

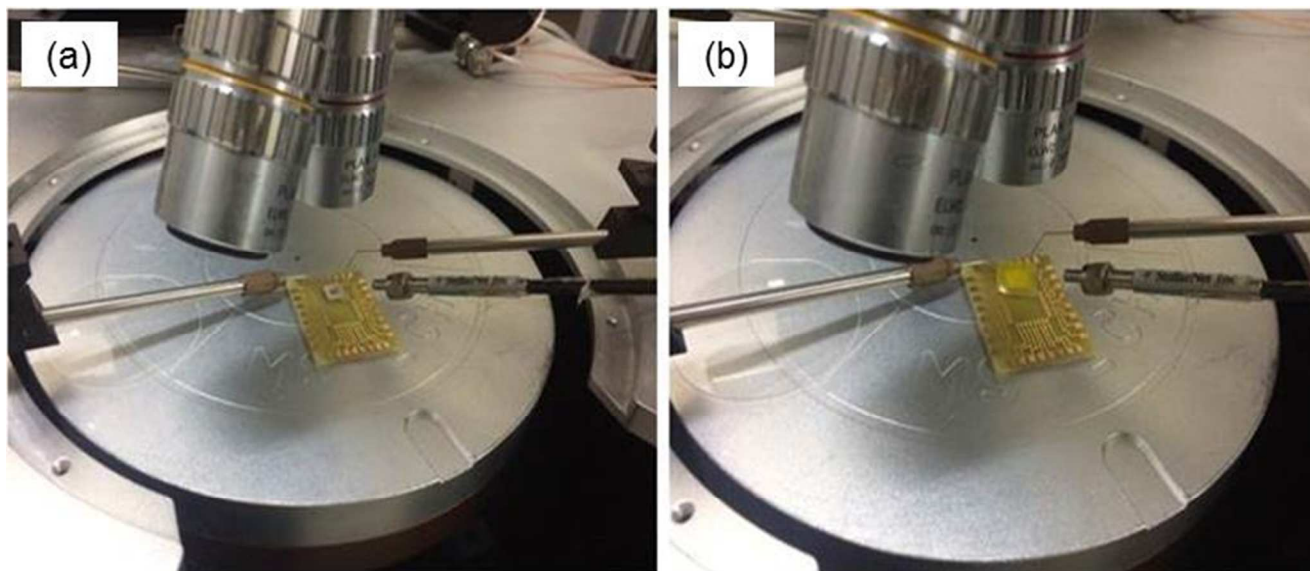

Supplement: Supplementary file 1 [file 11184530]
